# Supplementary material
Source: PubMed Central journal article supplement (PMC7390665)
Supplement: NIHMS1549581-supplement-Supplemental_Data_File__doc__pdf__etc__.pdf [file NIHMS1549581-supplement-Supplemental_Data_File__doc__pdf__etc__.pdf]

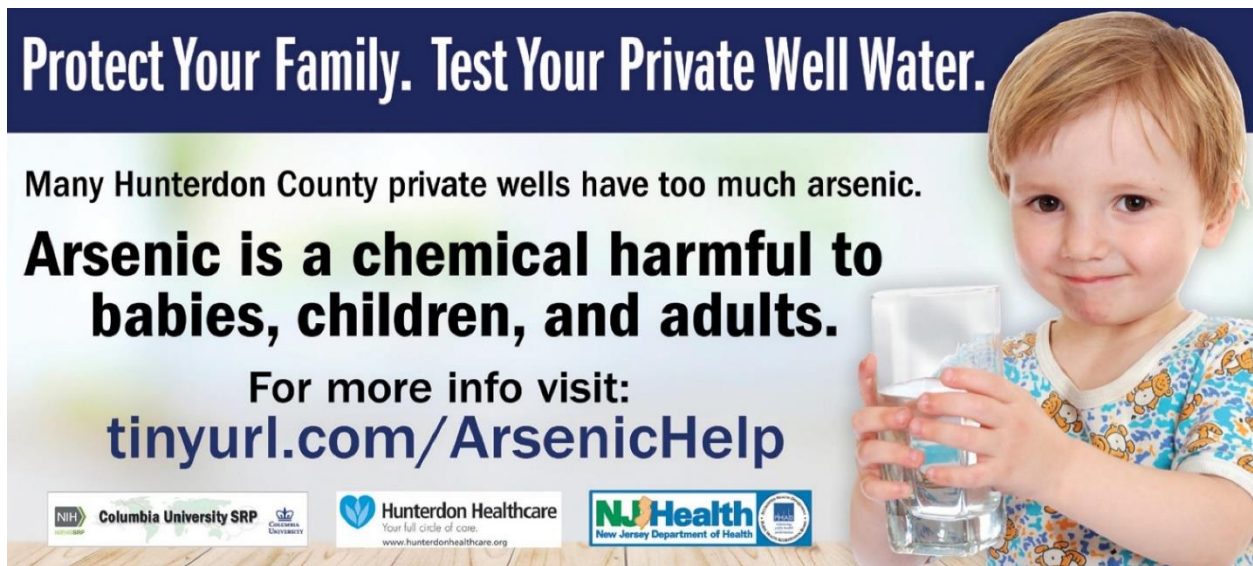

Figure S1. Billboard posted in Hunterdon County

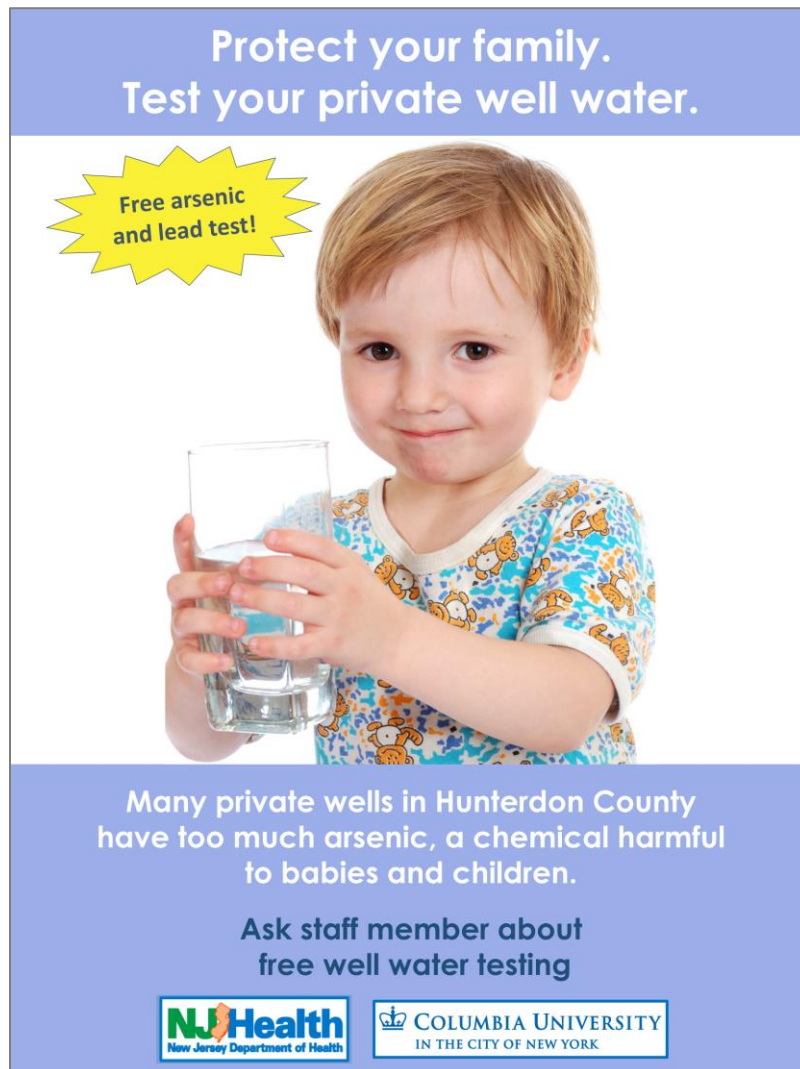

Figure S2. Poster in participating clinics

# Arsenic in New Jersey Private Well Water

## Exposure to Arsenic

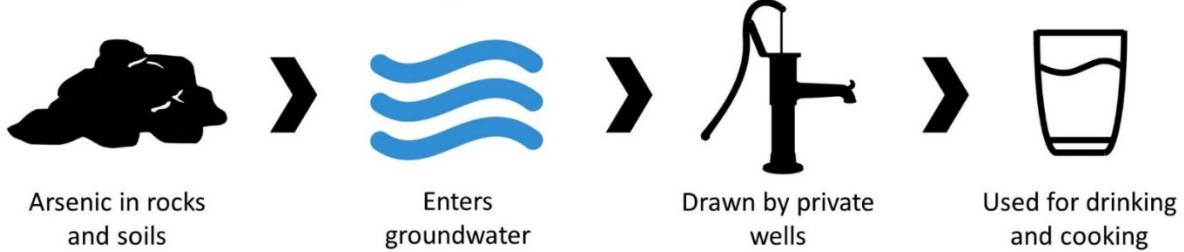

## Health Effects of Arsenic Across the Life Course

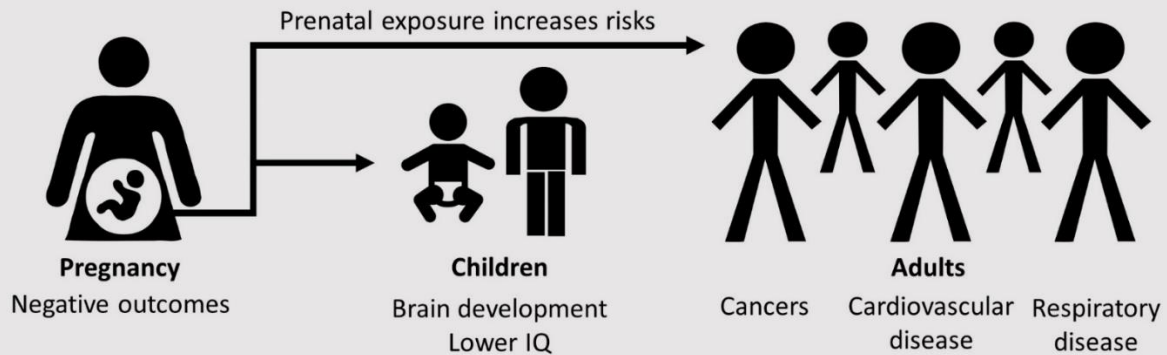

## Every Well Must Be Tested

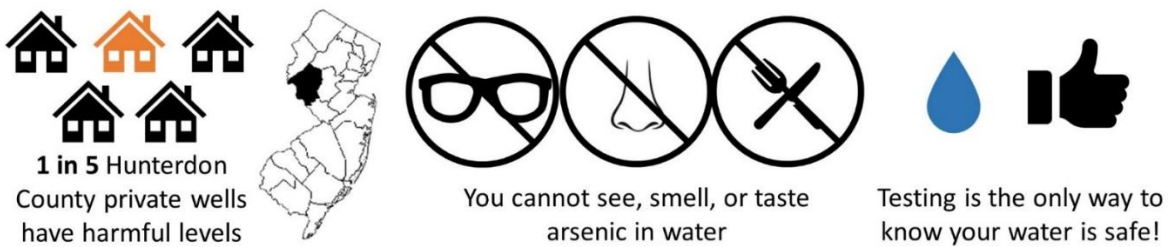

## Reducing Exposure

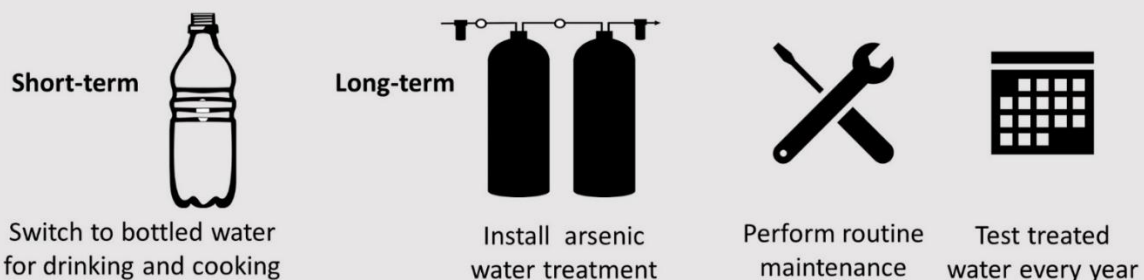

Columbia University Superfund Research Program

More info, guidance, FAQs: [tinyurl.com/ArsenicHelp](https://tinyurl.com/ArsenicHelp)

Figure S3. Infographic shared on arsenic awareness website and over social media
